# Supplementary material
Source: publisher figshare collection journal article supplement (https://acs.figshare.com/ndownloader/files/17726441)
Supplement: Supplementary file 1 [file 17726441]

# **Supporting Information**

## **Electrochemical Reduction of Carbon Dioxide on Au Nanoparticles: an in-Situ FTIR Study**

Shuai Chen, Aicheng Chen\*

Electrochemical Technology Centre, Department of Chemistry, University of Guelph, 50 Stone Road East, Guelph, Ontario N1G 2W1, Canada

\* Corresponding author: [aicheng@uoguelph.ca](mailto:aicheng@uoguelph.ca)

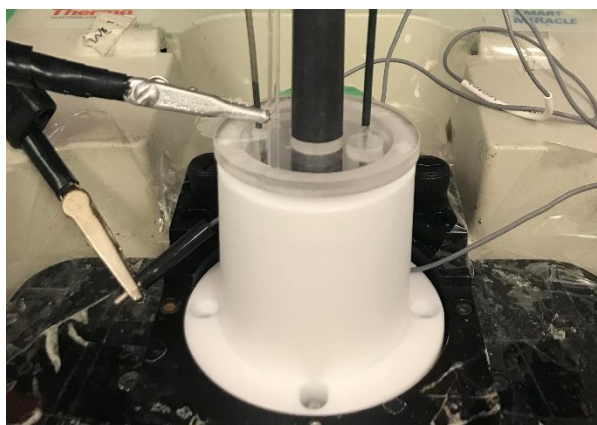

**Figure S1.** A photograph of the in-Situ electrochemical FTIR cell setup.

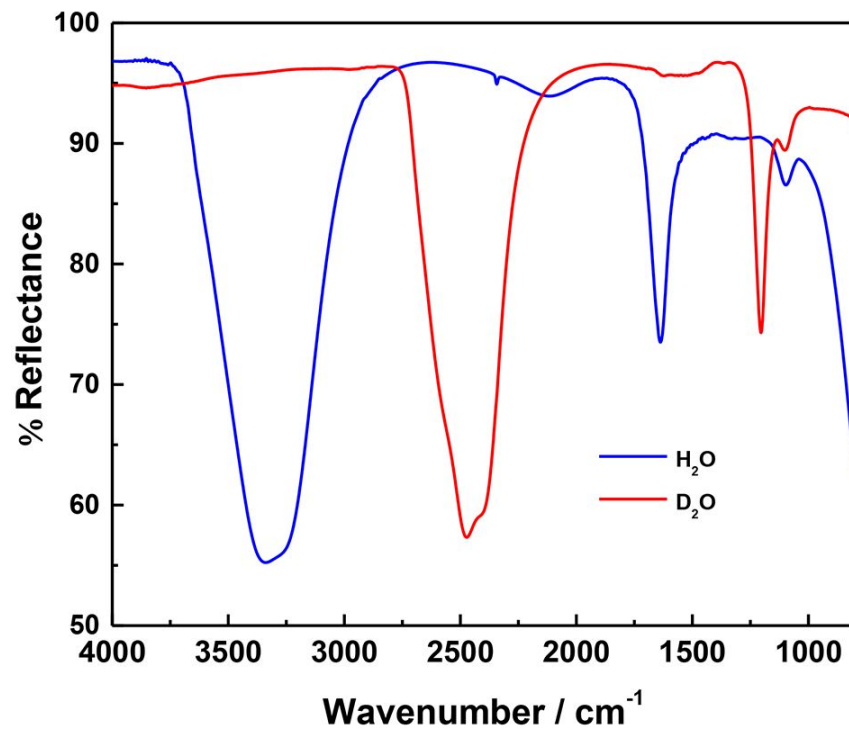

**Figure S2.** The reference spectra collected at the potential of 0.2 V vs RHE in a 0.1M Na<sub>2</sub>SO<sub>4</sub> saturated with CO<sub>2</sub>, where either H<sub>2</sub>O or D<sub>2</sub>O was used as the solvent.

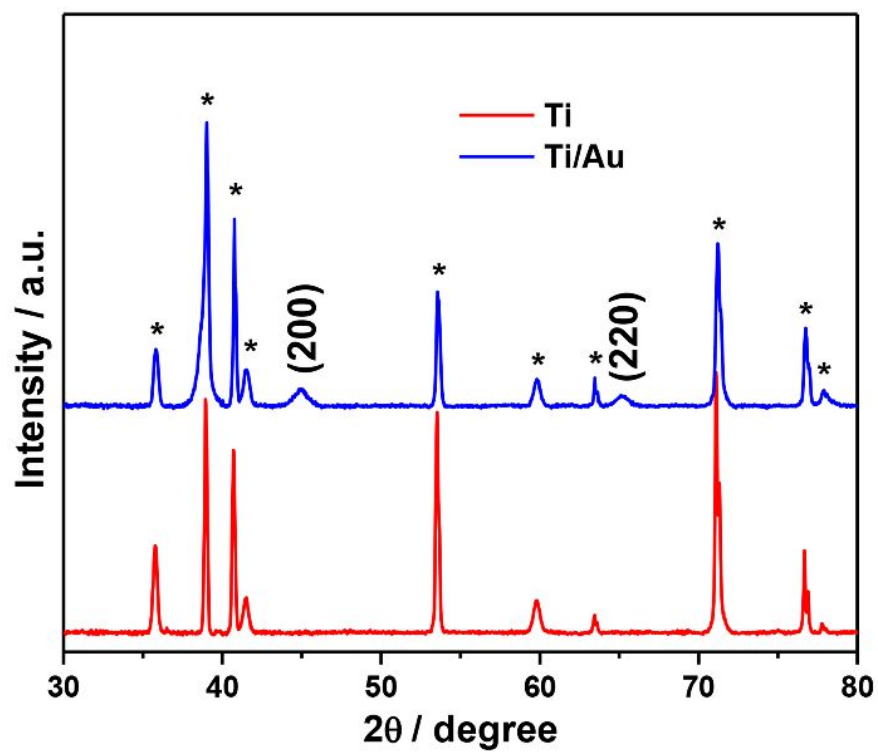

**Figure S3.** XRD patterns of Ti/Au (blue) and Ti plate (red).

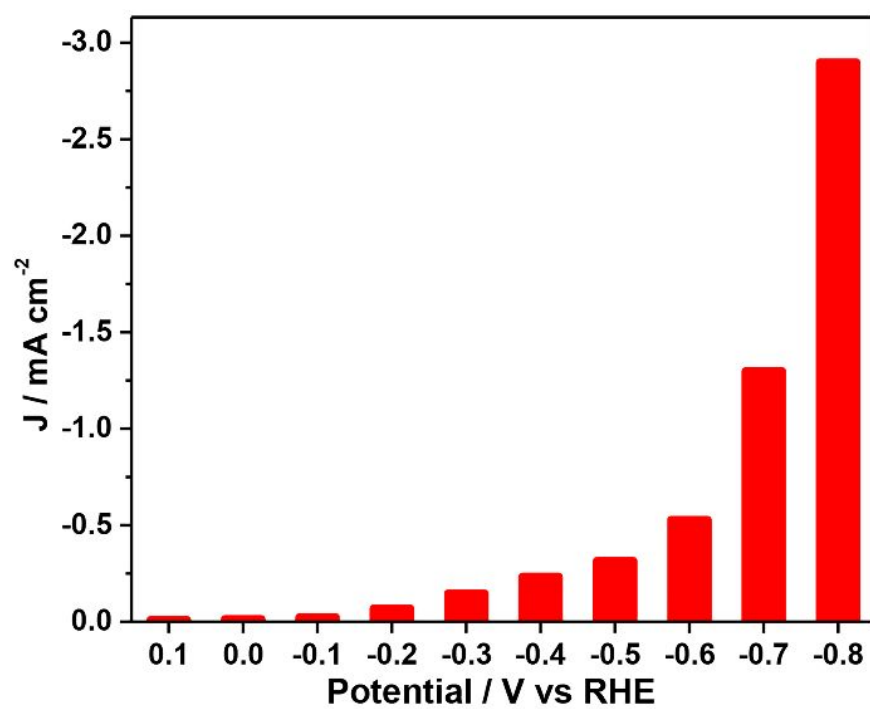

**Figure S4.** Steady current densities at 50 s from Fig. 3(c) at various applied potentials.

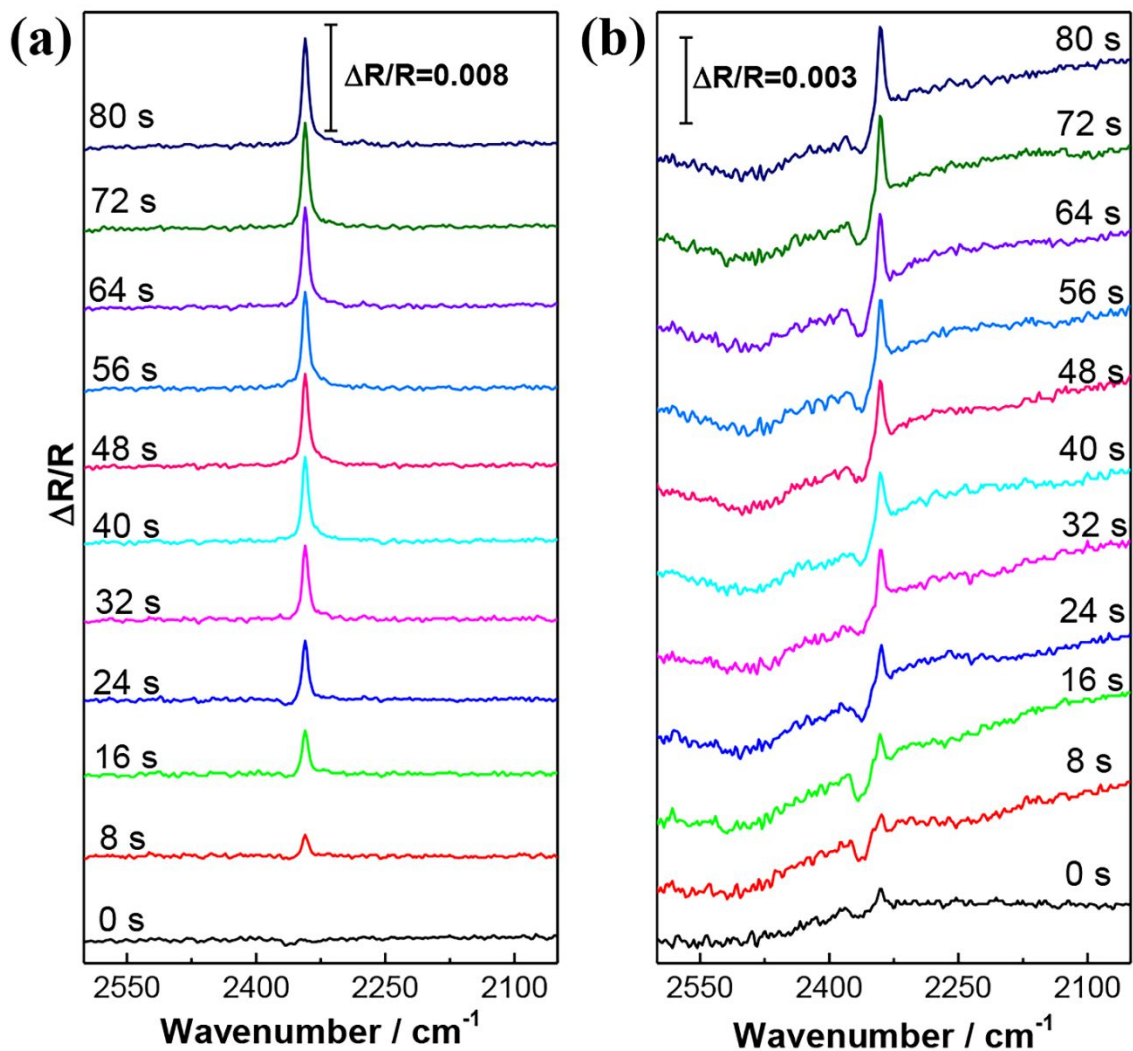

**Figure S5.** CO<sub>2</sub> consumption peaks in H<sub>2</sub>O (a) and in D<sub>2</sub>O (b) at 2344 cm<sup>-1</sup> from SNIFTIR spectra on the Au electrode following saturation with CO<sub>2</sub> in a 0.10 M Na<sub>2</sub>SO<sub>4</sub> solution every eight seconds, from 0 second to 80 seconds under an applied potential of -0.50 V.  $\Delta R/R = (R_{E2} - R_{E1})/R_{E1}$ , where the reference spectrum  $R_{E1}$  was taken at  $E = 0.20$  V.

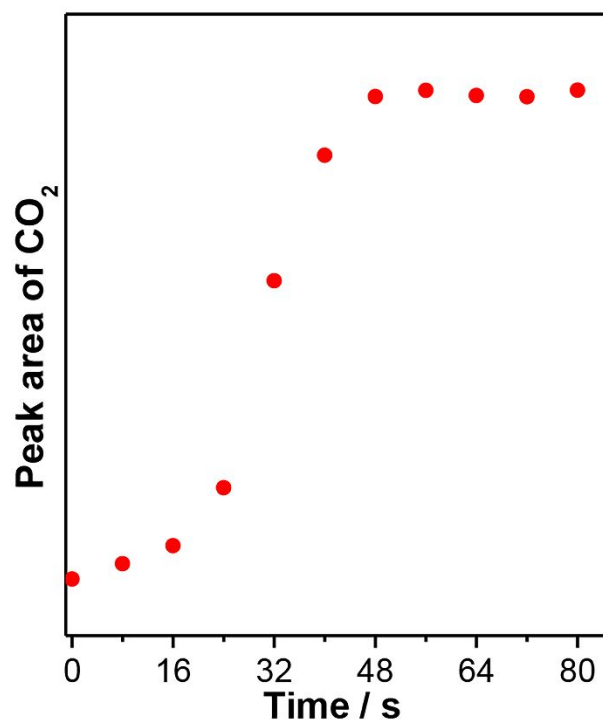

**Figure S6.** CO<sub>2</sub> consumption peak areas at 2344 cm<sup>-1</sup> from SNIFTIR spectra every eight seconds, from 0 second to 80 seconds on the Au following saturation with CO<sub>2</sub> in a 0.10 M Na<sub>2</sub>SO<sub>4</sub> solution in H<sub>2</sub>O, under an applied potential -0.50 V.

**Table S1.** Peak positions ( $\text{cm}^{-1}$ ) present in 0.10 M  $\text{Na}_2\text{SO}_4$  with  $\text{H}_2\text{O}$  and  $\text{D}_2\text{O}$  and their assignments.

| Wavenumber<br>( $\text{cm}^{-1}$ ) | Peak assignment                           | Wavenumber<br>( $\text{cm}^{-1}$ ) | Peak assignment                           |                                              |
|------------------------------------|-------------------------------------------|------------------------------------|-------------------------------------------|----------------------------------------------|
| 3300                               | $\nu_{\text{ss}}$ (HOH)                   | 2520                               | $\nu_{\text{ss}}$ (DOD)                   | $\text{H}_2\text{O}$<br>$\text{D}_2\text{O}$ |
| 1645                               | $\nu_{\text{sb}}$ (HOH)                   | 1190                               | $\nu_{\text{sb}}$ (DOD)                   |                                              |
| 2344                               | $\nu_{\text{as}}$ (OCO) ( $\text{CO}_2$ ) | 2341                               | $\nu_{\text{as}}$ (OCO) ( $\text{CO}_2$ ) | $\text{CO}_2$                                |
| 1560                               | $\nu_{\text{as}}$ ( $\text{COO}^-$ )      | 1560                               | $\nu_{\text{as}}$ ( $\text{COO}^-$ )      | $\text{COO}^-$<br>(Adsorbed)                 |
| 1410                               | $\nu_{\text{ss}}$ ( $\text{COO}^-$ )      | 1410                               | $\nu_{\text{ss}}$ ( $\text{COO}^-$ )      |                                              |
| 1460                               | $\nu_{\text{ss}}$ (OCO)                   | 1460                               | $\nu_{\text{ss}}$ (OCO)                   | $\text{HCO}_3^-$<br>$\text{DCO}_3^-$         |
| 1360                               | $\nu_{\text{ss}}$ (OCO)                   | 1366                               | $\nu_{\text{ss}}$ (OCO)                   |                                              |
| 1100                               | $\nu_{\text{ss}}$ $\text{SO}_4$           | 1095                               | $\nu_{\text{ss}}$ ( $\text{SO}_4$ )       | $\text{SO}_4^{2-}$                           |
| 1640                               | $\nu_{\text{as}}$ ( $\text{COO}^-$ )      | 1627                               | $\nu_{\text{as}}$ ( $\text{COO}^-$ )      | $\text{HCOO}^-$<br>$\text{DCOO}^-$           |
| 1298                               | $\nu_{\text{ss}}$ ( $\text{COO}^-$ )      | 1283                               | $\nu_{\text{ss}}$ ( $\text{COO}^-$ )      |                                              |
| 1350                               | $\nu_{\text{b}}$ (CH)                     | 986                                | $\nu_{\text{b}}$ (CD)                     |                                              |
